# Supplementary material for: Defined conditions for propagation and manipulation of mouse embryonic stem cells
Source: PubMed Central journal article supplement (PMC6451320; doi:10.1242/dev.173146), 2019-03-26
Supplement: develop-146-173146-s1.pdf [file develop-146-173146-s1.pdf]

Table S1 - Media recipes

Three versions of N2B27 are provided. The first recipe, uses in-house N2 with added insulin (as in original N2 recipe – Ying et al. 2013) to give a final concentration of 12.5µg/ml. In the alternative versions insulin is added separately, either at 20µg/ml (which might aid neural differentiation of ES cells from certain strains, e.g. pure BL6) or at 12.5µg/ml (routine ES cell culture and differentiation). In-house preparation of N2 is recommended as commercial products vary.

| Media                                                                            | Shelf-life and storage                                                                                                                | Reagent                                                  | Supplier                          | Volume | Final concentration |
|----------------------------------------------------------------------------------|---------------------------------------------------------------------------------------------------------------------------------------|----------------------------------------------------------|-----------------------------------|--------|---------------------|
| <i>N2B27 – recipe for 1000ml. Can be prepared, aliquoted and stored at -80°C</i> | <3 weeks at 4°C, can be made up to 1L, aliquoted and stored at -80°C. Avoid re-freezing.                                              | DMEM/F12                                                 | Sigma Aldrich - D6421             | 487ml  |                     |
|                                                                                  |                                                                                                                                       | Neurobasal                                               | Thermo Fisher - 21103049          | 487ml  |                     |
|                                                                                  | L-Glutamine will degrade easily, avoid leaving at 37°C for long time.<br><br>Open bottles of Neurobasal should be used within a month | B27 (50X)                                                | Invitrogen, cat. no 17504044      | 10ml   | 0.5X                |
|                                                                                  |                                                                                                                                       | N2 (with insulin* – 200X)                                | Made in house – aliquots at -80°C | 5ml    | 1X                  |
|                                                                                  |                                                                                                                                       | β-mercaptoethanol (50mM stock)                           | Thermo Fisher - 31350-010         | 1ml    | 50µM                |
|                                                                                  |                                                                                                                                       | L-glutamine (200mM stock)                                | Thermo Fisher - 25030081          | 10ml   | 2mM                 |
| <i>Neural specific N2B27 – high insulin. Recipe for 100ml</i>                    | <3 weeks at 4°C, can be made up to 1L, aliquoted and stored at -80°C. Avoid re-freezing.                                              | DMEM/F12                                                 | Sigma Aldrich - D6421             | 47.5ml |                     |
|                                                                                  |                                                                                                                                       | Neurobasal                                               | Thermo Fisher - 21103049          | 47.5ml |                     |
|                                                                                  | L-Glutamine will degrade easily, avoid leaving at 37°C for long time.<br><br>Open bottles of Neurobasal should be used within a month | B27 (50X)                                                | Invitrogen, cat. no 17504044      | 1ml    | 0.5X                |
|                                                                                  |                                                                                                                                       | N2.BV (200X)                                             | Made in house – aliquots at -80°C | 0.5ml  | 1X                  |
|                                                                                  |                                                                                                                                       | β-mercaptoethanol (50mM stock)                           | Thermo Fisher - 31350-010         | 0.1ml  | 50µM                |
|                                                                                  |                                                                                                                                       | L-glutamine (200mM stock)                                | Thermo Fisher - 25030081          | 1ml    | 2mM                 |
|                                                                                  |                                                                                                                                       | Sodium bicarbonate (7.5% stock)                          | Thermo Fisher - 25080094          | 1.33ml | 0.1%                |
|                                                                                  |                                                                                                                                       | Optional: bovine serum albumin fraction V. (7.5% stock). | Thermo Fisher - 15260037          | 1.5ml  | 0.11%               |
|                                                                                  |                                                                                                                                       | Insulin, human recombinant, zinc solution (4mg/ml stock) | Thermo Fisher- 12585014           | 0.5ml  | <b>20µg/ml*</b>     |

|                                                                                                                                               |                                                                                                                                                                                                                                       |                                                                                                                      |                                                     |                    |                            |
|-----------------------------------------------------------------------------------------------------------------------------------------------|---------------------------------------------------------------------------------------------------------------------------------------------------------------------------------------------------------------------------------------|----------------------------------------------------------------------------------------------------------------------|-----------------------------------------------------|--------------------|----------------------------|
| <i>Alternative N2B27 – Recipe for 100ml. Allows using a single version of N2 (N2.BV), and adjusting the insulin concentration separately.</i> | <3 weeks at 4°C, can be made up to 1L, aliquoted and stored at -80°C. Avoid re-freezing.<br><br>L-Glutamine will degrade easily, avoid leaving at 37°C for long time.<br><br>Open bottles of Neurobasal should be used within a month | DMEM/F12                                                                                                             | Sigma Aldrich - D6421                               | 47.5ml             |                            |
|                                                                                                                                               |                                                                                                                                                                                                                                       | Neurobasal                                                                                                           | Thermo Fisher - 21103049                            | 47.5ml             |                            |
|                                                                                                                                               |                                                                                                                                                                                                                                       | B27 (50X)                                                                                                            | Invitrogen, cat. no 17504044                        | 1ml                | 0.5X                       |
|                                                                                                                                               |                                                                                                                                                                                                                                       | N2.BV (200X)                                                                                                         | Made in house – aliquots at -80°C                   | 0.5ml              | 1X                         |
|                                                                                                                                               |                                                                                                                                                                                                                                       | β-mercaptoethanol (50mM stock)                                                                                       | Thermo Fisher - 31350-010                           | 0.1ml              | 50μM                       |
|                                                                                                                                               |                                                                                                                                                                                                                                       | L-glutamine (200mM stock)                                                                                            | Thermo Fisher - 25030081                            | 1ml                | 2mM                        |
|                                                                                                                                               |                                                                                                                                                                                                                                       | Sodium bicarbonate (7.5% stock)                                                                                      | Thermo Fisher - 25080094                            | 1.33ml             | 0.1%                       |
|                                                                                                                                               |                                                                                                                                                                                                                                       | Optional: bovine serum albumin fraction V. (7.5% stock).<br>Insulin, human recombinant, zinc solution (4mg/ml stock) | Thermo Fisher - 15260037<br>Thermo Fisher- 12585014 | 1.5ml<br>0.3125 ml | 0.11%<br><b>12.5μg/ml*</b> |
| <i>Wash medium (serum-free, for accutase cultures)</i>                                                                                        | ~1 month at 4°C                                                                                                                                                                                                                       | DMEM/F12                                                                                                             | Sigma Aldrich - D6421                               | 500ml              |                            |
|                                                                                                                                               |                                                                                                                                                                                                                                       | bovine serum albumin fraction V (7.5% stock).                                                                        | Thermo Fisher - 15260037                            | 8ml                | 0.11%                      |
| <i>Wash medium for trypsin dissociated</i>                                                                                                    | ~1 month at 4°C                                                                                                                                                                                                                       | DMEM/F12                                                                                                             | Sigma Aldrich - D6421                               | 500ml              |                            |
|                                                                                                                                               |                                                                                                                                                                                                                                       | FCS                                                                                                                  |                                                     | 25ml               | 4.7%                       |
| <i>2i/LIF</i>                                                                                                                                 | 1 week at 4°C max. Storage at ~6-10°C will result in deterioration                                                                                                                                                                    | N2B27                                                                                                                | See above                                           |                    |                            |
|                                                                                                                                               |                                                                                                                                                                                                                                       | PD0325901 (10mM stock in DMSO)                                                                                       | Various                                             |                    | 1μM                        |
|                                                                                                                                               |                                                                                                                                                                                                                                       | CHIR99021 (10mM stock in DMSO)                                                                                       | Various                                             |                    | 3μM                        |
|                                                                                                                                               |                                                                                                                                                                                                                                       | LIF (stock concentration depends on supplier)                                                                        | Sigma-Aldrich L5158 or Millipore ESG1106            |                    | 100U/mL                    |
| <i>Gelatine</i>                                                                                                                               |                                                                                                                                                                                                                                       |                                                                                                                      | Sigma-Aldrich G1890                                 |                    | 0.1-0.2% in PBS            |
| <i>Accutase</i>                                                                                                                               | ~2 weeks. Accutase will get deactivated if left at 37°C for a long time (~1-2hrs)                                                                                                                                                     |                                                                                                                      | Millipore SCR005                                    |                    |                            |

\* Note that the original B27 recipe contained 2μg/ml insulin. The composition of commercial B27 is not available.
